# Supplementary material
Source: publisher site journal article supplement (https://www.dovepress.com/article/177324)
Supplement: Supplementary file 1 [file get_supplementary_file.php]

## Supplementary Materials

### ITC results for efficacy outcomes used in costing

Bleeding and rescue medication use were based on the ITC matching the ROMI trial to the EPAG trial

(Table S1. ITC results for outcomes used in costing)

| Sub-group          |                                       | Value in the model |       |       |                          |                          |
|--------------------|---------------------------------------|--------------------|-------|-------|--------------------------|--------------------------|
|                    |                                       | EPAG               | ROMI  | W&R   | OR (95% CI):<br>EPAG/W&R | OR (95% CI):<br>ROMI/W&R |
| All patients       | <i>Number of patients</i>             | 135                | 84    | 62+41 |                          |                          |
|                    | <i>Severe bleeding (WHO 3-5)</i>      | 2.2%               | 3.7%  | 6.5%  | 0.33 (0.07, 1.52)        | 0.55 (0.16, 1.93)        |
|                    | <i>All bleeding (WHO 2-5)</i>         | 8.9%               | 5.7%  | 14.5% | 0.57 (0.23, 1.45)        | 0.35 (0.15, 0.85)        |
|                    | <i>Moderate bleeding only (WHO 2)</i> | 6.7%               | 2.8%  | 8.1%  | 0.81 (0.26, 2.54)        | 0.32 (0.11, 0.94)        |
| Splenuctomized     | <i>Number of patients</i>             | 50                 | 42    | 21+21 |                          |                          |
|                    | <i>Severe bleeding (WHO 3-5)</i>      | 1.0%               | 4.5%  | 9.5%  | 0.10 (0.00, 2.23)        | 0.45 (0.10, 2.00)        |
|                    | <i>All bleeding (WHO 2-5)</i>         | 8.0%               | 9.4%  | 19.0% | 0.37 (0.08, 1.65)        | 0.44 (0.14, 1.40)        |
|                    | <i>Moderate bleeding only (WHO 2)</i> | 7.0%               | 5.7%  | 9.5%  | 0.72 (0.12, 4.40)        | 0.57 (0.14, 2.41)        |
| Non-Splenuctomized | <i>Number of patients</i>             | 85                 | 42    | 41+20 |                          |                          |
|                    | <i>Severe bleeding (WHO 3-5)</i>      | 3.5%               | 4.6%  | 4.9%  | 0.71 (0.11, 4.44)        | 0.95 (0.08, 11.14)       |
|                    | <i>All bleeding (WHO 2-5)</i>         | 9.4%               | 3.3%  | 12.2% | 0.75 (0.23, 2.45)        | 0.25 (0.06, 1.00)        |
|                    | <i>Moderate bleeding only (WHO 2)</i> | 5.9%               | 1.2%  | 7.3%  | 0.79 (0.18, 3.49)        | 0.15 (0.03, 0.86)        |
| All patients       | <i>Use of rescue medication</i>       | 18.0%              | 10.4% | 40.0% | 0.33 (0.17, 0.64)        | 0.17 (0.08, 0.39)        |

Table S1. ITC results for outcomes used in costing

| Sub-group    |                                  | Value in the model |      |       |                          |                          |
|--------------|----------------------------------|--------------------|------|-------|--------------------------|--------------------------|
|              |                                  | EPAG               | ROMI | W&R   | OR (95% CI):<br>EPAG/W&R | OR (95% CI):<br>ROMI/W&R |
| All patients | <i>Number of patients</i>        | 135                | 84   | 62+41 |                          |                          |
|              | <i>Severe bleeding (WHO 3-5)</i> | 2.2%               | 3.7% | 6.5%  | 0.33 (0.07, 1.52)        | 0.55 (0.16, 1.93)        |

|                    |                                       |       |       |       |                   |                    |
|--------------------|---------------------------------------|-------|-------|-------|-------------------|--------------------|
|                    | <i>All bleeding (WHO 2-5)</i>         | 8.9%  | 5.7%  | 14.5% | 0.57 (0.23, 1.45) | 0.35 (0.15, 0.85)  |
|                    | <i>Moderate bleeding only (WHO 2)</i> | 6.7%  | 2.8%  | 8.1%  | 0.81 (0.26, 2.54) | 0.32 (0.11, 0.94)  |
| Splenuctomized     | <i>Number of patients</i>             | 50    | 42    | 21+21 |                   |                    |
|                    | <i>Severe bleeding (WHO 3-5)</i>      | 1.0%  | 4.5%  | 9.5%  | 0.10 (0.00, 2.23) | 0.45 (0.10, 2.00)  |
|                    | <i>All bleeding (WHO 2-5)</i>         | 8.0%  | 9.4%  | 19.0% | 0.37 (0.08, 1.65) | 0.44 (0.14, 1.40)  |
|                    | <i>Moderate bleeding only (WHO 2)</i> | 7.0%  | 5.7%  | 9.5%  | 0.72 (0.12, 4.40) | 0.57 (0.14, 2.41)  |
| Non-Splenuctomized | <i>Number of patients</i>             | 85    | 42    | 41+20 |                   |                    |
|                    | <i>Severe bleeding (WHO 3-5)</i>      | 3.5%  | 4.6%  | 4.9%  | 0.71 (0.11, 4.44) | 0.95 (0.08, 11.14) |
|                    | <i>All bleeding (WHO 2-5)</i>         | 9.4%  | 3.3%  | 12.2% | 0.75 (0.23, 2.45) | 0.25 (0.06, 1.00)  |
|                    | <i>Moderate bleeding only (WHO 2)</i> | 5.9%  | 1.2%  | 7.3%  | 0.79 (0.18, 3.49) | 0.15 (0.03, 0.86)  |
| All patients       | <i>Use of rescue medication</i>       | 18.0% | 10.4% | 40.0% | 0.33 (0.17, 0.64) | 0.17 (0.08, 0.39)  |

## Primary costs

Table S2. Primary therapy dosing schedule

| Drug               | Kg or M2 | Form | Dosing information | Indicated dose (mg for oral, mg/2 for IV) | Mean dose in trial | Dose intensity | Final dose | Dosing schedule per week | Treatment duration in weeks |
|--------------------|----------|------|--------------------|-------------------------------------------|--------------------|----------------|------------|--------------------------|-----------------------------|
| <b>Eltrombopag</b> |          | Oral | mg                 | 50                                        | 55                 | 100.0%         | 55         | 7                        | 26                          |
| <b>Romiplostim</b> | 81       | IV   | ug/kg              | 2                                         | 317                | 100.0%         | 317        | 1                        | 26                          |
| <b>Rituximab**</b> | 1.7      | IV   | mg/m2              | 375                                       | 638                | 100.0%         | 638        | 1                        | 4                           |

\*\*Assuming 4 weeks of therapy

Table S3. Primary therapy costs

| Drug                | Cost per Pack | Unit per pack | Unit strength | Price per unit | Pack needed | Administration costs per week* | Cost per week | Total Administration cost | Total cost (all treatment duration) |
|---------------------|---------------|---------------|---------------|----------------|-------------|--------------------------------|---------------|---------------------------|-------------------------------------|
| <b>Eltrombopag†</b> | 10,253.00     | 30            | 75            | 342            | 6.07        | 0.00                           | 2,392         | 0                         | 62,202                              |
| <b>Romiplostim†</b> | 6,492.00      | 4             | 250           | 1623           | 13.0        | 75.2                           | 3,321         | 1,955                     | 84,396                              |
| <b>Rituximab†</b>   | 1,720.59      | 10            | 20            | 172            | 12.8        | 222.3                          | 5,728         | 889                       | 22,024                              |

†Source: Novartis internal pricing database

Administration costs

Subcutaneous injection and IV administration costs were obtained from the CMS Medicare Fee Schedule. Romiplostim administration was based on subcutaneous injection costs. IV administration (used for rituximab) were assumed to be delivered within one hour. It was assumed that orally-delivered therapies had no administrative cost.

*Table S4. Administration costs*

| Drug                       | Cost per Pack |
|----------------------------|---------------|
| <b>Oral cost</b>           | 0.00          |
| <b>Subcutaneous</b>        | 75.19         |
| <b>IV first hour</b>       | 136.41        |
| <b>IV additional hours</b> | 28.64         |

Routine care costs

Laboratory visits, office visits, outpatient visits, and emergency department visits were included in the model.

To calculate the cost of each service, Saleh *et al* cost estimates were inflation-adjusted based on an inflation rate of 3.6% over 7 years, and were adjusted to reflect costs for a 26-week period (since their estimates were based on a year-long time horizon).

*Table S5. Routine care costs*

| Resource                 | Mean resource use (yearly) | % Related to ITP | Unit cost        | Final adjusted value | Final unit costs | Final cost for 26 weeks and inflated |
|--------------------------|----------------------------|------------------|------------------|----------------------|------------------|--------------------------------------|
| <b>Laboratory visits</b> | 0.9                        | 10.70%           | Platelet: \$6.11 | 0.048                | 27.00            | 17.91                                |

| Hepatic: \$11.13                   |     |        |                               |       |        |               |
|------------------------------------|-----|--------|-------------------------------|-------|--------|---------------|
| <b>Office visits</b>               | 2.1 | 18.20% | \$50.84 (Assumed in facility) | 0.191 | 78.00  | 51.75         |
| <b>Other outpatient visits</b>     | 1.1 | 28.20% | \$75.19 (Non-facility)        | 0.155 | 367.00 | 243.51        |
| <b>Emergency department visits</b> | 0.5 | 52%    | \$62.66                       | 0.130 | 260.00 | 172.51        |
|                                    |     |        |                               |       |        | <b>485.69</b> |

Source: Saleh et al (2009)

### Rescue treatment costs

Wastage was included for the rescue treatment estimates (ie it was assumed that no vial sharing or “pill-splitting” took place).

Table S6. Rescue medication dosing and costs

| <b>Dosing schedule</b>       |          |      |                    |                                   |                |                |                  |                 |
|------------------------------|----------|------|--------------------|-----------------------------------|----------------|----------------|------------------|-----------------|
| Drug                         | Kg or M2 | Form | Dosing information | Dosing (mg for oral, mg/2 for IV) | Indicated dose | Dose intensity | Final total dose | Dosing schedule |
| <b>IVIg</b>                  | 81       | IV   | 1 g/kg for 2 days  | 81                                | 81             | 100.0%         | 162              | 2               |
| <b>IV methylprednisolone</b> | 81       | IV   | 4 X 40 mg          | 40                                | 40             | 100.0%         | 160              | 4               |

  

| <b>Drug costs</b>        |               |               |               |                |                                |                            |              |                                      |                                                           |
|--------------------------|---------------|---------------|---------------|----------------|--------------------------------|----------------------------|--------------|--------------------------------------|-----------------------------------------------------------|
| Drug                     | Cost per Pack | Unit per pack | Unit strength | Price per unit | Pack needed (Wastage included) | Administration costs total | Utilization* | Total cost (all treatment durations) | Source                                                    |
| <b>Blood Transfusion</b> |               |               |               | 424.9          |                                |                            | 24.4%        | 104                                  | Utilization: Lee et al (2013)<br>Cost: Toner et al (2011) |
| Rescue medications       |               |               |               |                |                                |                            |              |                                      |                                                           |
| <b>IVIg</b>              | 37.89         | 1             | 0.5           | 38             | 324.00                         | 272.82                     | 40.0%        | 12,549                               | Utilization: Cheng et al (2013)                           |

|                                                              |      |   |    |   |      |       |       |     |                                       | Cost: Medicare<br>ASP Drug<br>Pricing Files |
|--------------------------------------------------------------|------|---|----|---|------|-------|-------|-----|---------------------------------------|---------------------------------------------|
| <b>IV<br/>methylprednisolone</b>                             | 3.73 | 1 | 40 | 4 | 4.00 | 545.6 | 60.0% | 561 | Utilization:<br>Cheng et al<br>(2013) | Cost: Medicare<br>ASP Drug<br>Pricing Files |
| <b>Total</b>                                                 |      |   |    |   |      |       |       |     | <b>5,460</b>                          |                                             |
| <i>Source of utilization: Lee et al (2013)</i>               |      |   |    |   |      |       |       |     |                                       |                                             |
| <i>*Per Cheng et al (2011), 60% received corticosteroids</i> |      |   |    |   |      |       |       |     |                                       |                                             |

*Table S7. Summary rescue medication costs*

| Drug                    | % with Rescue<br>Medication | Average<br>Costs |
|-------------------------|-----------------------------|------------------|
| <b>Eltrombopag</b>      | 18.0%                       | 982.77           |
| <b>Romiplostim</b>      | 10.4%                       | 568.99           |
| <b>Watch and rescue</b> | 40.0%                       | 2,183.93         |

### Bleeding related costs

Costs per bleeding event (with and without hospitalization) were based on Lin et al (2017) estimates.

*Table S8. Bleeding related costs (all patients)*

| Drug                    | Severe/significant<br>bleeding | Moderate<br>bleeding events | Average costs of<br>G3-5 bleedings | Average costs of<br>G2 bleedings | All bleeding<br>costs |
|-------------------------|--------------------------------|-----------------------------|------------------------------------|----------------------------------|-----------------------|
| <b>Eltrombopag</b>      | 2.2%                           | 6.7%                        | 990.89                             | 146.40                           | 1,137.29              |
| <b>Romiplostim</b>      | 3.7%                           | 2.8%                        | 1,640.48                           | 60.55                            | 1,701.02              |
| <b>Watch and rescue</b> | 6.5%                           | 8.1%                        | 2,876.78                           | 177.09                           | 3,053.87              |

### Adverse event costs

Adverse event (AE) prevalence was based on the respective clinical trials for each comparator.

Only all grade AEs reported in  $\geq 20\%$  of patients were included in the model, as serious AE data were not available for all comparators.

Table S9. Adverse event prevalence and costs

| Adverse Events                           | Eltrombopag | Romiplostim | Watch and Rescue | Unit Costs |
|------------------------------------------|-------------|-------------|------------------|------------|
| <b>Arthralgia</b>                        | 7.0%        | 26.0%       | 5.0%             | 14,109.26  |
| <b>Confusion</b>                         | 1.0%        | 25.0%       | 5.0%             | 26,260.18  |
| <b>Diarrhea</b>                          | 13.0%       | 17.0%       | 10.0%            | 8,032.65   |
| <b>Epistaxis</b>                         | 5.0%        | 32.0%       | 10.0%            | 32,356.37  |
| <b>Fatigue</b>                           | 10.0%       | 33.0%       | 13.0%            | 6,297.79   |
| <b>Headache</b>                          | 30.0%       | 35.0%       | 33.0%            | 27,715.11  |
| <b>Infusion Reactions</b>                | 0.0%        | 0.0%        | 0.0%             | 8,615.54   |
| <b>Pain in Extremities</b>               | 7.0%        | 13.0%       | 10.0%            | 14,109.26  |
| <b>Petechiae</b>                         | 0.0%        | 17.0%       | 0.0%             | 14,109.26  |
| <b>Upper respiratory tract infection</b> | 10.0%       | 17.0%       | 11.0%            | 21,094.77  |

Cost source: HCUPnet, 2013

Inflation source: Inflation of 3.6% (2015 to June 2016), [US Bureau of Labor Statistics]

Note: Non-reported assumed to be at 0% prevalence

Mortality costs

Table S10. Summary mortality related costs (all patients)

| Drug                    | Mortality | Average costs |
|-------------------------|-----------|---------------|
| <b>Eltrombopag</b>      | 0.1%      | 44.01         |
| <b>Romiplostim</b>      | 0.1%      | 72.85         |
| <b>Watch and rescue</b> | 0.2%      | 127.76        |
